# Supplementary material
Source: MDPI journal article supplement (https://www.mdpi.com/1996-1073/16/19/6904)
Supplement: s1 [file s1]

*Supplementary Information for*

# **“Steel, Aluminum, and FRP-Composites: Race to Zero Carbon Emissions”**

**Vaishnavi Vijay Rajulwar<sup>1</sup>, Tetiana Shyrokykh<sup>1\*</sup>, Robert Stirling<sup>1</sup>, Tova Jarnerud<sup>1,2</sup>, Yuri Korobeinikov<sup>1</sup>, Sudip Bose<sup>3</sup>, Basudev Bhattacharya<sup>3</sup>, Debashish Bhattacharjee<sup>3</sup>, Seetharaman Sridhar<sup>1</sup>**

<sup>1</sup> Ira A. Fulton Schools of Engineering, Arizona State University, 85281 Tempe, Arizona

<sup>2</sup> SWERIM AB, Process Metallurgy, SE-974 37 Luleå, Sweden

<sup>3</sup> Tata Steel LTD, India

\* Correspondence: tetiana.shyrokykh@asu.edu

## S1. Cost Estimation Tables for Traditional Electrical Grid Cost Models

Note: All references marked with an asterisk (\*) denote an assumption or calculation that is described in the primary manuscript.

| Blast Furnace / Basic Oxygen Furnace Steelmaking Costs |          |                   |         |                   |                    |                |
|--------------------------------------------------------|----------|-------------------|---------|-------------------|--------------------|----------------|
| Item                                                   | Quantity | Unit              | \$/Unit | Total Cost (\$/t) | Quantity Reference | Cost Reference |
| Scrap Steel                                            | 0.148    | t                 | 283     | \$41.8            | [1]                | [1]            |
| Iron Ore                                               | 1.509    | t                 | 107     | \$ 161.5          | [1]                | [2]            |
| Coking + PCI Coal                                      | 0.86     | t                 | 145     | \$ 124.7          | [1]                | [1]            |
| Industrial Gases                                       | 162      | m <sup>3</sup>    | 0.12    | \$19.4            | [1]                | [1]            |
| Ferroalloys                                            | 0.009    | t                 | 1600    | \$14.4            | [1]                | [1]            |
| Fluxes                                                 | 0.46     | t                 | 50      | \$23.0            | [1]                | [1]            |
| Refractories                                           | 0.004    | t                 | 1300    | \$5.2             | [1]                | [1]            |
| Other Costs                                            | 1        | count             | 20      | \$20.0            | [1]                | [1]            |
| Natural Gas                                            | 0        | kWh <sub>th</sub> | 0.015   | \$-               | *                  | [3]            |
| Electricity -Reheat/Rolling                            | 105      | kWh               | 0       | \$-               | [4]                | *              |
| Electricity - Steelmaking                              | 295      | kWh               | 0       | \$-               | [4], *             | *              |
| Labor                                                  | 1        | count             | 25      | \$25.0            |                    | [5]            |
| Capital Charges                                        | 1        | count             | 148.5   | \$ 148.5          |                    | [4]            |
| Carbon Emission Surcharge                              | 2.17     | t-CO <sub>2</sub> | 80      | \$ 173.9          | *                  | *              |
| Total (including carbon tax)                           |          |                   |         | \$ 757.5          |                    |                |

| Electric Arc Furnace Steelmaking Costs |          |                   |         |                   |                    |                |
|----------------------------------------|----------|-------------------|---------|-------------------|--------------------|----------------|
| Item                                   | Quantity | Unit              | \$/Unit | Total Cost (\$/t) | Quantity Reference | Cost Reference |
| Scrap Steel                            | 1.1      | t                 | 283     | \$ 310.9          | [1]                | [1]            |
| Ferroalloys                            | 0.021    | t                 | 1600    | \$33.6            | [1]                | [1]            |
| Electrodes                             | 2        | kg                | 4       | \$8.0             | [1]                | [1]            |
| Other Costs                            | 1        | count             | 31      | \$31.0            | [1]                | [1]            |
| Electricity - EAF                      | 421      | kWh               | 0.0545  | \$22.9            | *                  | *              |
| Electricity - Hot Rolling              | 105      | kWh               | 0.0545  | \$5.7             | [4]                | *              |
| Labor                                  | 1        | count             | 15      | \$15.0            |                    | [5]            |
| Capital Charges                        | 1        | count             | 105     | \$ 105            |                    | SI S4.1        |
| Carbon Emission Surcharge              | 0.4      | t-CO <sub>2</sub> | 80      | \$32.0            | *                  | *              |
| Total (including carbon tax)           |          |                   |         | \$ 564.5          |                    |                |

| Natural Gas DRI + EAF     |          |                 |         |                   |                    |                |
|---------------------------|----------|-----------------|---------|-------------------|--------------------|----------------|
| Item                      | Quantity | Unit            | \$/Unit | Total Cost (\$/t) | Quantity Reference | Cost Reference |
| Iron Ore                  | 1.4      | t               | 107     | \$ 149.8          | [6]                | [2]            |
| Natural Gas               | 262      | Sm <sup>3</sup> | 0.136   | \$35.6            | [6]                | [3]            |
| Other Costs               | 1        | count           | 10.44   | \$10.4            |                    | [7]            |
| Electricity - EAF         | 600      | kWh             | 0.0545  | \$32.7            | *                  | *              |
| Electricity - Hot Rolling | 105      | kWh             | 0.0545  | \$5.7             | *                  | *              |

|                                     |             |                   |           |                 |   |            |
|-------------------------------------|-------------|-------------------|-----------|-----------------|---|------------|
| Labor                               | 1           | count             | 27        | \$27.0          |   | [5] , S4.1 |
| Capital Charges                     | 1           | count             | 171.6     | \$ 171.6        |   | S4.2       |
| <i>Carbon Emission Surcharge</i>    | <i>1.25</i> | t-CO <sub>2</sub> | <i>80</i> | <i>\$ 100.2</i> | * | *          |
| <b>Total (including carbon tax)</b> |             |                   |           | <b>\$ 533.0</b> |   |            |

| Hydrogen DRI+EAF                    |             |                   |           |                   |                    |                |
|-------------------------------------|-------------|-------------------|-----------|-------------------|--------------------|----------------|
| Item                                | Quantity    | Unit              | \$/Unit   | Total Cost (\$/t) | Quantity Reference | Cost Reference |
| Iron Ore                            | 1.4         | t                 | 107       | \$ 149.8          | [6]                | [2]            |
| Natural Gas                         | 50          | Sm <sup>3</sup>   | 0.136     | \$6.8             | [6]                | [3]            |
| Hydrogen                            | 79.4        | kg                | 4.5       | \$ 357.2          | [6]                | *              |
| Other Costs                         | 1           | count             | 10.44     | \$10.4            |                    | [7]            |
| Electricity - EAF                   | 494         | kWh               | 0.0545    | \$26.9            | *                  | *              |
| Electricity - Hot Rolling           | 105         | kWh               | 0.0545    | \$5.7             | *                  | *              |
| Labor                               | 1           | count             | 27        | \$27.0            |                    | [5] , S4.1     |
| Capital Charges                     | 1           | count             | 171.6     | \$ 171.6          |                    | S4.2           |
| <i>Carbon Emission Surcharge</i>    | <i>1.64</i> | t-CO <sub>2</sub> | <i>80</i> | <i>\$ 130.9</i>   | *                  | *              |
| <b>Total (including carbon tax)</b> |             |                   |           | <b>\$ 886.4</b>   |                    |                |

| Blast Furnace / Basic Oxygen Furnace Steelmaking w/ Carbon Capture Costs |            |                   |           |                   |                    |                |
|--------------------------------------------------------------------------|------------|-------------------|-----------|-------------------|--------------------|----------------|
| Item                                                                     | Quantity   | Unit              | \$/Unit   | Total Cost (\$/t) | Quantity Reference | Cost Reference |
| Scrap Steel                                                              | 0.148      | t                 | 283       | \$41.8            | [1]                | [1]            |
| Iron Ore                                                                 | 1.509      | t                 | 107       | \$ 161.5          | [1]                | [2]            |
| Coal                                                                     | 0.86       | t                 | 145       | \$ 124.7          | [1]                | [1]            |
| Industrial Gases                                                         | 162        | m <sup>3</sup>    | \$0.12    | \$19.4            | [1]                | [1]            |
| Ferroalloys                                                              | 0.009      | t                 | 1600      | \$14.4            | [1]                | [1]            |
| Fluxes                                                                   | 0.46       | t                 | 50        | \$23.0            | [1]                | [1]            |
| Refractories                                                             | 0.004      | t                 | 1300      | \$5.2             | [1]                | [1]            |
| Other Costs                                                              | 1          | count             | 20        | \$20.0            | [1]                | [1]            |
| Thermal Cost                                                             | 0          | kWh <sub>th</sub> | 0.015     | \$-               | *                  | [3]            |
| Electricity                                                              | 468        | kWh               | 0.000     | \$-               | [4]                | *              |
| Electricity - Hot Rolling                                                | 105        | kWh               | 0.000     | \$-               | [4] *              | *              |
| Labor                                                                    | 1          | count             | 25.0      | \$25.0            |                    | [5]            |
| Capital Charges                                                          | 1          | count             | 148.5     | \$ 148.5          |                    | [4]            |
| CCS (all charges)                                                        | 1.42       | t-CO <sub>2</sub> | 100       | \$ 142.1          | *                  | *              |
| <i>Carbon Emission Surcharge</i>                                         | <i>0.7</i> | t-CO <sub>2</sub> | <i>80</i> | <i>\$56.1</i>     | *                  | *              |
| <b>Total (BF-BOF + Carbon Capture)</b>                                   |            |                   |           | <b>\$ 781.7</b>   |                    |                |

| Natural Gas DRI + CCUS + EAF |          |                |         |                   |                    |                |
|------------------------------|----------|----------------|---------|-------------------|--------------------|----------------|
| Item                         | Quantity | Unit           | \$/Unit | Total Cost (\$/t) | Quantity Reference | Cost Reference |
| Iron Ore                     | 1.4      | t              | 107     | \$ 149.8          | [6]                | [2]            |
| Natural Gas                  | 262      | m <sup>3</sup> | 0.136   | \$35.6            | [6]                | [3]            |
| Other Costs                  | 1        | count          | 10.44   | \$10.4            |                    | [7]            |

|                                     |             |                   |           |                 |          |            |
|-------------------------------------|-------------|-------------------|-----------|-----------------|----------|------------|
| Electricity                         | 1000        | kWh               | 0.0545    | \$54.5          | *        | *          |
| Electricity - Hot Rolling           | 105         | kWh               | 0.0545    | \$5.7           | *        | *          |
| Capital Charges                     | 1           | count             | 171.6     | \$ 171.6        |          | [5] , S4.1 |
| CCS (all charges)                   | 0.64        | t-CO <sub>2</sub> | 100       | \$63.6          | *        | S4.2       |
| <i>Carbon Emission Surcharge</i>    | <i>0.68</i> | t-CO <sub>2</sub> | <i>80</i> | <i>\$54.8</i>   | <i>*</i> | <i>*</i>   |
| <b>Total (including carbon tax)</b> |             |                   |           | <b>\$ 546.0</b> |          |            |

| Primary Aluminum Costs              |             |                   |           |                   |                    |                |
|-------------------------------------|-------------|-------------------|-----------|-------------------|--------------------|----------------|
| Item                                | Quantity    | Unit              | \$/Unit   | Total Cost (\$/t) | Quantity Reference | Cost Reference |
| Bauxite                             | 5.1         | t                 | 52        | \$ 265.2          | [8]                | [9]            |
| Limestone                           | 0.06        | t                 | 35        | \$2.1             | [8]                | [10]           |
| Caustic Soda                        | 0.09        | t                 | 495       | \$44.6            | [8]                | [11]           |
| Thermal energy                      | 5450        | kWh               | 0.015     | \$84.1            | *                  | [3]            |
| Carbon Anode                        | 0.45        | t                 | 110       | \$49.5            | [8]                | [12]           |
| Electricity                         | 13394       | kWh               | 0.0545    | \$ 730.0          | *                  | *              |
| Labor                               | 1           | count             | 107.1     | \$ 107.1          |                    | [13]           |
| Natural Gas - Sheet Prod.           | 524         | kWh <sub>th</sub> | 0.015     | \$8.1             | *                  | [3]            |
| Electricity - Sheet Prod.           | 518         | kWh               | 0.0545    | \$28.2            | *                  | *              |
| Capital Charges                     | 1           | count             | 93.78     | \$93.8            |                    | [14]           |
| <i>Carbon Emission Surcharge</i>    | <i>8.22</i> | t-CO <sub>2</sub> | <i>80</i> | <i>\$ 657.3</i>   | <i>*</i>           | <i>*</i>       |
| <b>Total (including carbon tax)</b> |             |                   |           | <b>\$2,069.9</b>  |                    |                |

| Secondary Aluminum Production Costs |            |                   |           |                   |                    |                |
|-------------------------------------|------------|-------------------|-----------|-------------------|--------------------|----------------|
| Item                                | Quantity   | Unit              | \$/Unit   | Total Cost (\$/t) | Quantity Reference | Cost Reference |
| Scrap                               | 1.2        | t                 | 860       | \$1,031.9         | [15]               | [16]           |
| Natural Gas                         | 1265       | kWh <sub>th</sub> | 0.015     | \$19.5            | *                  | [3]            |
| Electricity                         | 222        | kWh               | 0.0545    | \$12.1            | *                  | *              |
| Labor                               | 1          | count             | 107.1     | \$ 107.1          |                    | [13]           |
| Natural Gas - Sheet Prod.           | 524        | kWh <sub>th</sub> | 0.015     | \$8.1             | *                  | [3]            |
| Electricity - Sheet Prod.           | 518        | kWh               | 0.0545    | \$28.2            | *                  | *              |
| Capital Charges                     | 1          | count             | 93.78     | \$93.8            |                    | [14]           |
| <i>Carbon Emission Surcharge</i>    | <i>0.4</i> | t-CO <sub>2</sub> | <i>80</i> | <i>\$35.8</i>     | <i>*</i>           | <i>*</i>       |
| <b>Total (including carbon tax)</b> |            |                   |           | <b>\$1336.5</b>   |                    |                |

| Primary Aluminum With CCU Making Costs |          |      |         |                   |                    |                |
|----------------------------------------|----------|------|---------|-------------------|--------------------|----------------|
| Item                                   | Quantity | Unit | \$/Unit | Total Cost (\$/t) | Quantity Reference | Cost Reference |
| Bauxite                                | 5.1      | t    | 52      | \$ 265.2          | [8]                | [9]            |
| Limestone                              | 0.06     | t    | 35      | \$2.1             | [8]                | [10]           |
| Caustic Soda                           | 0.09     | t    | 495     | \$44.6            | [8]                | [11]           |
| Thermal energy                         | 5450     | kWh  | 0.015   | \$84.1            | *                  | [3]            |
| Carbon Anode                           | 0.45     | t    | 110     | \$49.5            | [8]                | [12]           |
| Electricity                            | 13394    | kWh  | 0.0545  | \$ 730.0          | *                  | *              |

|                                          |     |                   |        |                  |   |      |
|------------------------------------------|-----|-------------------|--------|------------------|---|------|
| Labor                                    | 1   | count             | 107.1  | \$ 107.1         |   | [13] |
| Capital Charges                          | 1   | count             | 93.78  | \$93.8           | * | [14] |
| Natural Gas - Sheet Prod.                | 524 | kWh <sub>th</sub> | 0.015  | \$8.1            | * | [3]  |
| Electricity - Sheet Prod.                | 518 | kWh               | 0.0545 | \$28.2           |   | *    |
| CCS (all charges)                        | 1.5 | t-CO <sub>2</sub> | 137    | \$ 205.5         | * | *    |
| <i>Carbon Emission Surcharge</i>         | 6.8 | t-CO <sub>2</sub> | 80     | \$ 547.0         | * | *    |
| <b>Total (Aluminum Production + CCS)</b> |     |                   |        | <b>\$2,165.1</b> |   |      |

| Primary Aluminum making Costs, Decarbonized path |              |                   |         |                   |                    |                |
|--------------------------------------------------|--------------|-------------------|---------|-------------------|--------------------|----------------|
| Item                                             | Sizing Value | Unit              | \$/Unit | Total Cost (\$/t) | Quantity Reference | Cost Reference |
| Bauxite                                          | 5.1          | t                 | 52      | \$ 265.2          | [8]                | [9]            |
| Limestone                                        | 0.06         | t                 | 35      | \$2.1             | [8]                | [10]           |
| Caustic Soda                                     | 0.09         | t                 | 495     | \$44.6            | [8]                | [11]           |
| Electricity - Thermal                            | 5560         | kWh               | 0.0545  | \$ 303.0          | *                  | *              |
| Inert anodes                                     | 0.01         | t                 | 7374.5  | \$73.7            | [8]                | Below          |
| Electricity - Electrolysis                       | 16000        | kWh               | 0.0545  | \$ 872.0          | *                  | *              |
| Labor                                            | 1            | count             | 107.1   | \$ 107.1          |                    | [13]           |
| Natural Gas - Sheet Prod.                        | 524          | kWh <sub>th</sub> | 0.015   | \$8.1             | *                  | [3]            |
| Electricity - Sheet Prod.                        | 518          | kWh               | 0.0545  | \$28.2            | *                  | *              |
| Capital Charges                                  | 1            | count             | 93.78   | \$93.8            |                    | [14]           |
| <i>Carbon Emission Surcharge</i>                 | 8.96         | t-CO <sub>2</sub> | 80      | \$ 716.5          | *                  | *              |
| <b>Total (including carbon tax)</b>              |              |                   |         | <b>\$2,514.3</b>  |                    |                |

| Inert Anode Cost               |              |      |          |                   |                    |                |
|--------------------------------|--------------|------|----------|-------------------|--------------------|----------------|
| Item                           | Sizing Value | Unit | \$/Unit  | Total Cost (\$/t) | Quantity Reference | Cost Reference |
| Fe <sub>2</sub> O <sub>3</sub> | 0.483        | t    | \$700    | \$338.1           | [17]               | [18]           |
| NiO                            | 0.517        | t    | \$13,610 | \$7,036.4         | [17]               | S5             |
| <b>Total</b>                   |              |      |          | <b>\$7,374.5</b>  |                    |                |

| Glass Fiber Reinforced Composite (SMC) |          |                   |         |                   |                    |                |
|----------------------------------------|----------|-------------------|---------|-------------------|--------------------|----------------|
| Item                                   | Quantity | Unit              | \$/Unit | Total Cost (\$/t) | Quantity Reference | Cost Reference |
| Epoxy Resin                            | 0.5      | t                 | 4000    | 2000              | *                  |                |
| E-Glass (Structural Fabric)            | 0.5      | t                 | 2200    | 1100              | *                  | [19]           |
| Electricity (Thermoform)               | 972      | kWh               | 0.0545  | 53                | *                  | *              |
| Non-Materials Costs                    | 100%     | of mat            | \$3,153 | \$ 3,153          | *                  | Calc.          |
| <i>Carbon Emission Surcharge</i>       | 3.5      | t-CO <sub>2</sub> | 80      | \$ 278.7          | *                  | *              |
| <b>Total (including carbon tax)</b>    |          |                   |         | <b>\$6,584.7</b>  |                    |                |

| Carbon Fiber Reinforced Composite (CF-SMC) |          |      |         |                   |                    |                |
|--------------------------------------------|----------|------|---------|-------------------|--------------------|----------------|
| Item                                       | Quantity | Unit | \$/Unit | Total Cost (\$/t) | Quantity Reference | Cost Reference |
| Carbon Fiber (Fabric)                      | 0.35     | t    | 25000   | \$8,750.0         | *                  | [20]           |

|                                     |             |                   |           |                    |   |       |
|-------------------------------------|-------------|-------------------|-----------|--------------------|---|-------|
| Electricity (Thermoform)            | 972         | kwh               | 0.0545    | \$53.0             | * | *     |
| Epoxy Resin                         | 0.65        | t                 | 4000      | \$2,600.0          | * | [20]  |
| Non-Materials Costs                 | 100%        | of mat            | \$11,403  | \$ 11,403          | * | Calc. |
| <i>Carbon Emission Surcharge</i>    | <i>11.0</i> | t-CO <sub>2</sub> | <i>80</i> | <i>\$ 876.6</i>    | * | *     |
| <b>Total (including carbon tax)</b> |             |                   |           | <b>\$ 23,682.6</b> |   |       |

## S2. Cost Estimation Tables for Renewables-Based Electrical Grid Cost Models

*Note: All references marked with an asterisk (\*) denote an assumption or calculation that is described in the primary manuscript.*

| Blast Furnace / Basic Oxygen Furnace Steelmaking Costs |             |                   |           |                   |                    |                |
|--------------------------------------------------------|-------------|-------------------|-----------|-------------------|--------------------|----------------|
| Item                                                   | Quantity    | Unit              | \$/Unit   | Total Cost (\$/t) | Quantity Reference | Cost Reference |
| Scrap Steel                                            | 0.148       | t                 | 283       | \$41.8            | [1]                | [1]            |
| Iron Ore                                               | 1.509       | t                 | 107       | \$ 161.5          | [1]                | [2]            |
| Coking + PCI Coal                                      | 0.86        | t                 | 145       | \$ 124.7          | [1]                | [1]            |
| Industrial Gases                                       | 162         | m <sup>3</sup>    | 0.12      | \$19.4            | [1]                | [1]            |
| Ferroalloys                                            | 0.009       | t                 | 1600      | \$14.4            | [1]                | [1]            |
| Fluxes                                                 | 0.46        | t                 | 50        | \$23.0            | [1]                | [1]            |
| Refractories                                           | 0.004       | t                 | 1300      | \$5.2             | [1]                | [1]            |
| Other Costs                                            | 1           | count             | 20        | \$20.0            | [1]                | [1]            |
| Natural Gas                                            | 0           | kWh <sub>th</sub> | 0.015     | \$-               | *                  | [3]            |
| Electricity -Reheat/Rolling                            | 105         | kWh               | 0         | \$-               | [4]                | *              |
| Electricity - Steelmaking                              | 295         | kWh               | 0         | \$-               | [4], *             | *              |
| Labor                                                  | 1           | count             | 25        | \$25.0            |                    | [5]            |
| Capital Charges                                        | 1           | count             | 148.5     | \$ 148.5          |                    | [4]            |
| <i>Carbon Emission Surcharge</i>                       | <i>2.03</i> | t-CO <sub>2</sub> | <i>80</i> | <i>\$ 162.6</i>   | *                  | *              |
| <b>Total (including carbon tax)</b>                    |             |                   |           | <b>\$ 746.2</b>   |                    |                |

| Electric Arc Furnace Steelmaking Costs |            |                   |           |                   |                    |                |
|----------------------------------------|------------|-------------------|-----------|-------------------|--------------------|----------------|
| Item                                   | Quantity   | Unit              | \$/Unit   | Total Cost (\$/t) | Quantity Reference | Cost Reference |
| Scrap Steel                            | 1.1        | t                 | 283       | \$ 310.9          | [1]                | [1]            |
| Ferroalloys                            | 0.021      | t                 | 1600      | \$33.6            | [1]                | [1]            |
| Electrodes                             | 2          | kg                | 4         | \$8.0             | [1]                | [1]            |
| Other Costs                            | 1          | count             | 31        | \$31.0            | [1]                | [1]            |
| Electricity - EAF                      | 421        | kWh               | 0.0545    | \$22.9            | *                  | *              |
| Electricity - Hot Rolling              | 105        | kWh               | 0.0545    | \$5.7             | [4]                | *              |
| Labor                                  | 1          | count             | 15        | \$15.0            |                    | [5]            |
| Capital Charges                        | 1          | count             | 105       | \$ 105.3          |                    | SI S4.1        |
| <i>Carbon Emission Surcharge</i>       | <i>0.2</i> | t-CO <sub>2</sub> | <i>80</i> | <i>\$14.2</i>     | *                  | *              |
| <b>Total (including carbon tax)</b>    |            |                   |           | <b>\$ 546.7</b>   |                    |                |

| Natural Gas DRI + EAF               |             |                   |           |                   |                    |                |
|-------------------------------------|-------------|-------------------|-----------|-------------------|--------------------|----------------|
| Item                                | Quantity    | Unit              | \$/Unit   | Total Cost (\$/t) | Quantity Reference | Cost Reference |
| Iron Ore                            | 1.4         | t                 | 107       | \$ 149.8          | [6]                | [2]            |
| Natural Gas                         | 262         | Sm <sup>3</sup>   | 0.136     | \$35.6            | [6]                | [3]            |
| Other Costs                         | 1           | count             | 10.44     | \$10.4            |                    | [7]            |
| Electricity - EAF                   | 600         | kWh               | 0.0545    | \$32.7            | *                  | *              |
| Electricity - Hot Rolling           | 105         | kWh               | 0.0545    | \$5.7             | *                  | *              |
| Labor                               | 1           | count             | 27        | \$27.0            |                    | [5] , S4.1     |
| Capital Charges                     | 1           | count             | 171.6     | \$ 171.6          |                    | S4.2           |
| <i>Carbon Emission Surcharge</i>    | <i>0.92</i> | t-CO <sub>2</sub> | <i>80</i> | <i>\$74.0</i>     | *                  | *              |
| <b>Total (including carbon tax)</b> |             |                   |           | <b>\$ 506.8</b>   |                    |                |

| Hydrogen DRI+EAF                    |             |                   |           |                   |                    |                |
|-------------------------------------|-------------|-------------------|-----------|-------------------|--------------------|----------------|
| Item                                | Quantity    | Unit              | \$/Unit   | Total Cost (\$/t) | Quantity Reference | Cost Reference |
| Iron Ore                            | 1.4         | t                 | 107       | \$ 149.8          | [6]                | [2]            |
| Natural Gas                         | 50          | Sm <sup>3</sup>   | 0.136     | \$6.8             | [6]                | [3]            |
| Hydrogen                            | 79.4        | kg                | 4.5       | \$ 357.2          | [6]                | *              |
| Other Costs                         | 1           | count             | 10.44     | \$10.4            |                    | [7]            |
| Electricity - EAF                   | 494         | kWh               | 0.0545    | \$26.9            | *                  | *              |
| Electricity - Hot Rolling           | 105         | kWh               | 0.0545    | \$5.7             | *                  | *              |
| Labor                               | 1           | count             | 27        | \$27.0            |                    | [5] , S4.1     |
| Capital Charges                     | 1           | count             | 171.6     | \$ 171.6          |                    | S4.2           |
| <i>Carbon Emission Surcharge</i>    | <i>0.31</i> | t-CO <sub>2</sub> | <i>80</i> | <i>\$24.7</i>     | *                  | *              |
| <b>Total (including carbon tax)</b> |             |                   |           | <b>\$ 780.2</b>   |                    |                |

| Blast Furnace / Basic Oxygen Furnace Steelmaking w/ Carbon Capture Costs |            |                   |           |                   |                    |                |
|--------------------------------------------------------------------------|------------|-------------------|-----------|-------------------|--------------------|----------------|
| Item                                                                     | Quantity   | Unit              | \$/Unit   | Total Cost (\$/t) | Quantity Reference | Cost Reference |
| Scrap Steel                                                              | 0.148      | t                 | 283       | \$41.8            | [1]                | [1]            |
| Iron Ore                                                                 | 1.509      | t                 | 107       | \$ 161.5          | [1]                | [2]            |
| Coal                                                                     | 0.86       | t                 | 145       | \$ 124.7          | [1]                | [1]            |
| Industrial Gases                                                         | 162        | m <sup>3</sup>    | \$0.12    | \$19.4            | [1]                | [1]            |
| Ferroalloys                                                              | 0.009      | t                 | 1600      | \$14.4            | [1]                | [1]            |
| Fluxes                                                                   | 0.46       | t                 | 50        | \$23.0            | [1]                | [1]            |
| Refractories                                                             | 0.004      | t                 | 1300      | \$5.2             | [1]                | [1]            |
| Other Costs                                                              | 1          | count             | 20        | \$20.0            | [1]                | [1]            |
| Thermal Cost                                                             | 0          | kWh <sub>th</sub> | 0.015     | \$-               | *                  | [3]            |
| Electricity                                                              | 468        | kWh               | 0.000     | \$-               | [4]                | *              |
| Electricity - Hot Rolling                                                | 105        | kWh               | 0.000     | \$-               | [4] *              | *              |
| Labor                                                                    | 1          | count             | 25.0      | \$25.0            |                    | [5]            |
| Capital Charges                                                          | 1          | count             | 148.5     | \$ 148.5          |                    | [4]            |
| CCS (all charges)                                                        | 1.42       | t-CO <sub>2</sub> | 100       | \$ 142.1          | *                  | *              |
| <i>Carbon Emission Surcharge</i>                                         | <i>0.4</i> | t-CO <sub>2</sub> | <i>80</i> | <i>\$34.8</i>     | *                  | *              |

Total (BF-BOF + Carbon Capture)

\$ 760.4

| Natural Gas DRI + CCUS + EAF     |             |                   |           |                   |                    |                |
|----------------------------------|-------------|-------------------|-----------|-------------------|--------------------|----------------|
| Item                             | Quantity    | Unit              | \$/Unit   | Total Cost (\$/t) | Quantity Reference | Cost Reference |
| Iron Ore                         | 1.4         | t                 | 107       | \$ 149.8          | [6]                | [2]            |
| Natural Gas                      | 262         | m <sup>3</sup>    | 0.136     | \$35.6            | [6]                | [3]            |
| Other Costs                      | 1           | count             | 10.44     | \$10.4            |                    | [7]            |
| Electricity                      | 1000        | kWh               | 0.0545    | \$54.5            | *                  | *              |
| Electricity - Hot Rolling        | 105         | kWh               | 0.0545    | \$5.7             | *                  | *              |
| Capital Charges                  | 1           | count             | 171.6     | \$ 171.6          |                    | [5] , S4.1     |
| CCS (all charges)                | 0.64        | t-CO <sub>2</sub> | 100       | \$63.6            | *                  | S4.2           |
| <i>Carbon Emission Surcharge</i> | <i>0.33</i> | t-CO <sub>2</sub> | <i>80</i> | <i>\$26.3</i>     | *                  | *              |
| Total (including carbon tax)     |             |                   |           | \$ 517.5          |                    |                |

| Primary Aluminum Costs           |             |                   |           |                   |                    |                |
|----------------------------------|-------------|-------------------|-----------|-------------------|--------------------|----------------|
| Item                             | Quantity    | Unit              | \$/Unit   | Total Cost (\$/t) | Quantity Reference | Cost Reference |
| Bauxite                          | 5.1         | t                 | 52        | \$ 265.2          | [8]                | [9]            |
| Limestone                        | 0.06        | t                 | 35        | \$2.1             | [8]                | [10]           |
| Caustic Soda                     | 0.09        | t                 | 495       | \$44.6            | [8]                | [11]           |
| Thermal energy                   | 5450        | kWh               | 0.015     | \$84.1            | *                  | [3]            |
| Carbon Anode                     | 0.45        | t                 | 110       | \$49.5            | [8]                | [12]           |
| Electricity                      | 13394       | kWh               | 0.0545    | \$ 730.0          | *                  | *              |
| Labor                            | 1           | count             | 107.1     | \$ 107.1          |                    | [13]           |
| Natural Gas - Sheet Prod.        | 524         | kWh <sub>th</sub> | 0.015     | \$8.1             | *                  | [3]            |
| Electricity - Sheet Prod.        | 518         | kWh               | 0.0545    | \$28.2            | *                  | *              |
| Capital Charges                  | 1           | count             | 93.78     | \$93.8            |                    | [14]           |
| <i>Carbon Emission Surcharge</i> | <i>3.28</i> | t-CO <sub>2</sub> | <i>80</i> | <i>\$ 262.7</i>   | *                  | *              |
| Total (including carbon tax)     |             |                   |           | \$1,675.3         |                    |                |

| Secondary Aluminum Production Costs |            |                   |           |                   |                    |                |
|-------------------------------------|------------|-------------------|-----------|-------------------|--------------------|----------------|
| Item                                | Quantity   | Unit              | \$/Unit   | Total Cost (\$/t) | Quantity Reference | Cost Reference |
| Scrap                               | 1.2        | t                 | 860       | \$1,031.9         | [15]               | [16]           |
| Natural Gas                         | 1265       | kWh <sub>th</sub> | 0.015     | 19.5              | *                  | [3]            |
| Electricity                         | 222        | kWh               | 0.0545    | \$12.1            | *                  | *              |
| Labor                               | 1          | count             | 107.1     | \$ 107.1          |                    | [13]           |
| Natural Gas - Sheet Prod.           | 524        | kWh <sub>th</sub> | 0.015     | \$8.1             | *                  | [3]            |
| Electricity - Sheet Prod.           | 518        | kWh               | 0.0545    | \$28.2            | *                  | *              |
| Capital Charges                     | 1          | count             | 93.78     | \$93.8            |                    | [14]           |
| <i>Carbon Emission Surcharge</i>    | <i>0.4</i> | t-CO <sub>2</sub> | <i>80</i> | <i>\$29.5</i>     | *                  | *              |
| Total (including carbon tax)        |            |                   |           | \$1,330.2         |                    |                |

| Primary Aluminum With CCU Making Costs |  |  |  |  |  |  |
|----------------------------------------|--|--|--|--|--|--|
|----------------------------------------|--|--|--|--|--|--|



| Item                                     | Quantity | Unit              | \$/Unit | Total Cost (\$/t) | Quantity Reference | Cost Reference |
|------------------------------------------|----------|-------------------|---------|-------------------|--------------------|----------------|
| Bauxite                                  | 5.1      | t                 | 52      | \$ 265.2          | [8]                | [9]            |
| Limestone                                | 0.06     | t                 | 35      | \$2.1             | [8]                | [10]           |
| Caustic Soda                             | 0.09     | t                 | 495     | \$44.6            | [8]                | [11]           |
| Thermal energy                           | 5450     | kWh               | 0.015   | \$84.1            | *                  | [3]            |
| Carbon Anode                             | 0.45     | t                 | 110     | \$49.5            | [8]                | [12]           |
| Electricity                              | 13394    | kWh               | 0.0545  | \$ 730.0          | *                  | *              |
| Labor                                    | 1        | count             | 107.1   | \$ 107.1          |                    | [13]           |
| Capital Charges                          | 1        | count             | 93.78   | \$93.8            | *                  | [14]           |
| Natural Gas - Sheet Prod.                | 524      | kWh <sub>th</sub> | 0.015   | \$8.1             | *                  | [3]            |
| Electricity - Sheet Prod.                | 518      | kWh               | 0.0545  | \$28.2            |                    | *              |
| CCS (all charges)                        | 1.5      | count             | 137     | \$ 205.5          | *                  | *              |
| <i>Carbon Emission Surcharge</i>         | 1.7      | t-CO <sub>2</sub> | 80      | \$ 132.1          | *                  | *              |
| <b>Total (Aluminum Production + CCS)</b> |          |                   |         | <b>\$1,750.2</b>  |                    |                |

| Primary Aluminum making Costs, Decarbonized path |              |                   |         |                   |                    |                |
|--------------------------------------------------|--------------|-------------------|---------|-------------------|--------------------|----------------|
| Item                                             | Sizing Value | Unit              | \$/Unit | Total Cost (\$/t) | Quantity Reference | Cost Reference |
| Bauxite                                          | 5.1          | t                 | 52      | \$ 265.2          | [8]                | [9]            |
| Limestone                                        | 0.06         | t                 | 35      | \$2.1             | [8]                | [10]           |
| Caustic Soda                                     | 0.09         | t                 | 495     | \$44.6            | [8]                | [11]           |
| Electricity - Thermal                            | 5560         | kWh               | 0.0545  | \$ 303.0          | *                  | *              |
| Inert anodes                                     | 0.01         | t                 | 7374.5  | \$73.7            | [8]                | Below          |
| Electricity - Electrolysis                       | 16000        | kWh               | 0.0545  | \$ 872.0          | *                  | *              |
| Labor                                            | 1            | count             | 107.1   | \$ 107.1          |                    | [13]           |
| Natural Gas - Sheet Prod.                        | 524          | kWh <sub>th</sub> | 0.015   | \$8.1             | *                  | [3]            |
| Electricity - Sheet Prod.                        | 518          | kWh               | 0.0545  | \$28.2            | *                  | *              |
| Capital Charges                                  | 1            | count             | 93.78   | \$93.8            |                    | [14]           |
| <i>Carbon Emission Surcharge</i>                 | 1.16         | t-CO <sub>2</sub> | 80      | \$93.0            | *                  | *              |
| <b>Total (including carbon tax)</b>              |              |                   |         | <b>\$1,890.8</b>  |                    |                |

| Inert Anode Cost               |              |      |          |                   |                    |                |
|--------------------------------|--------------|------|----------|-------------------|--------------------|----------------|
| Item                           | Sizing Value | Unit | \$/Unit  | Total Cost (\$/t) | Quantity Reference | Cost Reference |
| Fe <sub>2</sub> O <sub>3</sub> | 0.483        | t    | \$ 700   | \$ 338.1          | [17]               | [18]           |
| NiO                            | 0.517        | t    | \$13,610 | \$7036.4          | [17]               | SI S5          |
| <b>Total</b>                   |              |      |          | <b>\$ 7374.5</b>  |                    |                |

| Glass Fiber Reinforced Composite (SMC) |          |      |         |                   |                    |                |
|----------------------------------------|----------|------|---------|-------------------|--------------------|----------------|
| Item                                   | Quantity | Unit | \$/Unit | Total Cost (\$/t) | Quantity Reference | Cost Reference |
| Epoxy Resin                            | 0.5      | t    | 4000    | 2000              | *                  |                |
| E-Glass (Structural Fabric)            | 0.5      | t    | 2200    | 1100              | *                  | [19]           |
| Electricity (Thermoform)               | 972      | kWh  | 0.0545  | 53                | *                  | *              |

|                                     |            |                   |           |                  |   |       |
|-------------------------------------|------------|-------------------|-----------|------------------|---|-------|
| Non-Materials Costs                 | 100%       | of mat            | \$3,153   | \$ 3,153         | * | Calc. |
| <i>Carbon Emission Surcharge</i>    | <i>2.9</i> | t-CO <sub>2</sub> | <i>80</i> | \$ 229.1         | * | *     |
| <b>Total (including carbon tax)</b> |            |                   |           | <b>\$6,535.1</b> |   |       |

| Carbon Fiber Reinforced Composite (CF-SMC) |            |                   |           |                    |                    |                |
|--------------------------------------------|------------|-------------------|-----------|--------------------|--------------------|----------------|
| Item                                       | Quantity   | Unit              | \$/Unit   | Total Cost (\$/t)  | Quantity Reference | Cost Reference |
| Carbon Fiber (Fabric)                      | 0.35       | t                 | 25000     | \$8,750.0          | *                  | [20]           |
| Electricity (Thermoform)                   | 972        | kwh               | 0.0545    | \$53.0             | *                  | *              |
| Epoxy Resin                                | 0.65       | t                 | 4000      | \$2,600.0          | *                  | [20]           |
| Non-Materials Costs                        | 100%       | of mat            | \$11,403  | \$ 11,403          | *                  | Calc.          |
| <i>Carbon Emission Surcharge</i>           | <i>6.7</i> | t-CO <sub>2</sub> | <i>80</i> | \$ 539.0           | *                  | *              |
| <b>Total (including carbon tax)</b>        |            |                   |           | <b>\$ 23,345.0</b> |                    |                |

### S3. Calculations for Railroad Freight Cost and Global Warming Potential

Global Warming Potential for rail transport of bulk freight is approximately 0.048 lbs CO<sub>2</sub> eq per ton-mile or 0.0148 kg CO<sub>2</sub> eq per tonne-km.[21] We assume cost of transportation is \$0.05 per ton-mile or \$0.0328 per tonne-km.[22]

Each Distance in Miles is multiplied by the corresponding coefficient to determine the Global Warming Potential or Cost to transport 1 tonne of steel from Austin, TX to the corresponding capital of the 48 contiguous states. This represents a very rough synthetic logistics model if all US steel demand were to be made in Austin, Texas. Texas was chosen as a location with appropriate geology for subsurface carbon dioxide sequestration. We do not take actual steel demand by location into account as that is beyond the scope of this simple calculation, but it could be an area of interest for future efforts.

| State       | Capital      | Distance from Austin, TX in miles [23] | Distance from Austin, TX in km | kg CO <sub>2</sub> eq / t steel (Metric Ton) | \$/t steel (Metric Ton) |
|-------------|--------------|----------------------------------------|--------------------------------|----------------------------------------------|-------------------------|
| Alabama     | Montgomery   | 1150                                   | 1851                           | 27                                           | 61                      |
| Arizona     | Phoenix      | 1100                                   | 1770                           | 26                                           | 58                      |
| Arkansas    | Little Rock  | 800                                    | 1287                           | 19                                           | 42                      |
| California  | Sacramento   | 1600                                   | 2575                           | 38                                           | 84                      |
| Colorado    | Denver       | 1200                                   | 1931                           | 29                                           | 63                      |
| Connecticut | Hartford     | 2000                                   | 3219                           | 48                                           | 106                     |
| Delaware    | Dover        | 2000                                   | 3219                           | 48                                           | 106                     |
| Florida     | Tallahassee  | 1200                                   | 1931                           | 29                                           | 63                      |
| Georgia     | Atlanta      | 1200                                   | 1931                           | 29                                           | 63                      |
| Idaho       | Boise        | 1800                                   | 2897                           | 43                                           | 95                      |
| Illinois    | Springfield  | 1000                                   | 1609                           | 24                                           | 53                      |
| Indiana     | Indianapolis | 1100                                   | 1770                           | 26                                           | 58                      |
| Iowa        | Des Moines   | 1300                                   | 2092                           | 31                                           | 69                      |
| Kansas      | Topeka       | 1200                                   | 1931                           | 29                                           | 63                      |
| Kentucky    | Frankfort    | 1300                                   | 2092                           | 31                                           | 69                      |
| Louisiana   | Baton Rouge  | 1000                                   | 1609                           | 24                                           | 53                      |
| Maine       | Augusta      | 2200                                   | 3541                           | 52                                           | 116                     |

|                |                |             |             |           |           |
|----------------|----------------|-------------|-------------|-----------|-----------|
| Maryland       | Annapolis      | 2000        | 3219        | 48        | 106       |
| Massachusetts  | Boston         | 2000        | 3219        | 48        | 106       |
| Michigan       | Lansing        | 1400        | 2253        | 33        | 74        |
| Minnesota      | Saint Paul     | 1500        | 2414        | 36        | 79        |
| Mississippi    | Jackson        | 1050        | 1690        | 25        | 55        |
| Missouri       | Jefferson City | 1200        | 1931        | 29        | 63        |
| Montana        | Helena         | 2000        | 3219        | 48        | 106       |
| Nebraska       | Lincoln        | 1400        | 2253        | 33        | 74        |
| Nevada         | Carson City    | 1800        | 2897        | 43        | 95        |
| New Hampshire  | Concord        | 2000        | 3219        | 48        | 106       |
| New Jersey     | Trenton        | 2000        | 3219        | 48        | 106       |
| New Mexico     | Santa Fe       | 1600        | 2575        | 38        | 84        |
| New York       | Albany         | 2000        | 3219        | 48        | 106       |
| North Carolina | Raleigh        | 1300        | 2092        | 31        | 69        |
| North Dakota   | Bismarck       | 1800        | 2897        | 43        | 95        |
| Ohio           | Columbus       | 1300        | 2092        | 31        | 69        |
| Oklahoma       | Oklahoma City  | 1100        | 1770        | 26        | 58        |
| Oregon         | Salem          | 2100        | 3380        | 50        | 111       |
| Pennsylvania   | Harrisburg     | 2000        | 3219        | 48        | 106       |
| Rhode Island   | Providence     | 2000        | 3219        | 48        | 106       |
| South Carolina | Columbia       | 1300        | 2092        | 31        | 69        |
| South Dakota   | Pierre         | 1600        | 2575        | 38        | 84        |
| Tennessee      | Nashville      | 1200        | 1931        | 29        | 63        |
| Utah           | Salt Lake City | 1600        | 2575        | 38        | 84        |
| Vermont        | Montpelier     | 2000        | 3219        | 48        | 106       |
| Virginia       | Richmond       | 1500        | 2414        | 36        | 79        |
| Washington     | Olympia        | 2200        | 3541        | 52        | 116       |
| West Virginia  | Charleston     | 1500        | 2414        | 36        | 79        |
| Wisconsin      | Madison        | 1400        | 2253        | 33        | 74        |
| Wyoming        | Cheyenne       | 1800        | 2897        | 43        | 95        |
| <b>Average</b> |                | <b>1549</b> | <b>2493</b> | <b>37</b> | <b>82</b> |

#### S4. Estimation of Capital Charges and Labor Charges

Capital charges are allocated per tonne of product based on corporate announcements for plant construction costs or directly from the literature as noted. These capital charges are dependent on an operating firm's debt financing choices, therefore we have selected a discount rate that is appropriate for an average firm. The average weighted average cost of capital (WACC) for the USA steel industry in 2023 is estimated to be 10 %.[24]

Capital Recovery Factor (CRF) is calculated as follows:

$$CRF = \frac{i(1+i)^n}{(1+i)^n - 1} = 0.106$$

Where:

i = Discount Rate = 10 %/ year

n = Analysis Period = 30 years

The allocation termed "Capital Charge" includes Capital Expense and Maintenance, therefore to levelized the charge per tonne of product,

$$\text{Capital Charge } (\$/t) = \frac{\text{CAPEX}[\$] * \text{CRF}}{\text{Annual Capacity}[t/y]}$$

#### S4.1 Electric Arc Furnace Capital Expenses

##### *Capital Expense Estimate*

*"Hot on the heels of Tuesday's announcement of a new steel mill from U.S. Steel, Nucor Corp. revealed January 12 [2020] it would build its own new sheet metal plant in West Virginia. The \$2.7 billion mill will employ 800 people and produce about 3 million tons of steel when it becomes operational in 2024, according to a company release." [25]*

Converting 3 million short tons to metric tons yields 2.72 Mt/ y capacity. This investment includes automotive galvanizing equipment so it is appropriate for this study, but our calculation may slightly overestimate HRC costs.

#### S4.2 DRI / HBI Capital Expenses and Labor Expenses (Natural Gas and Hydrogen)

##### *Capital Expense Estimate*

*"This \$1 billion project has been transformative for our Company and the region. [26]*

*"Capacity 1.6 mt/ a [27]*

We use this as a data proxy for the DRI-based process costs.

##### *Labor Expense Estimate*

*"This \$1 billion project has been transformative for our Company and the region. It was one of the largest construction projects in the Great Lakes region, employing 1,100 people during peak construction. At the end of 2020, we employed 140 full-time employees at the plant with annual wages and benefits of approximately \$17 million. [26]*

*"From 2017 to 2021, the company invested \$1 billion in the HBI plant, and during 2021 it was able to ramp up operations to achieve full production rates. In 2021, Cleveland-Cliffs consumed 1.1 million tonnes of HBI in its operations. The HBI plant was designed with a capacity of 1.6 million tonnes a year. [28]*

Allocating the \$17 million wages and benefits to 1.1 million tonnes, we estimate \$15/t of labor charges for DRI / HBI production. We assume this will hold for mature Hydrogen DRI plants as they will be somewhat similar in terms of plant design and automation.

#### S5 Price of Nickel Oxide, Iron Oxides, and Inert Anodes

United States Trade and Tariff Information can be searched online.[29] This search can provide declared value for difficult to find commodities. The average declared value for "Nickel Oxides and Hydroxides" in 2019 was determined to be \$13.61 / kg.

Inert Anodes for the production of Aluminum are difficult to estimate costs for, as performance and cost data tends to be proprietary to the firms researching them. We assume long term costs will converge around the total cost of compositional materials. Consumption of inert anodes is assumed to be small[17], so this is not a key contribution to the cost of the Decarbonized Primary Aluminum Scenario.

## SUPPLEMENTARY INFORMATION REFERENCES

1. 2022 Bof Steelmaking Cost Model Basic Oxygen Furnace Available online: <https://www.steelonthenet.com/cost-bof.html> (accessed on 13 March 2023).
2. Latest Oil, Energy & Metals News, Market Data and Analysis Available online: <https://www.spglobal.com/commodityinsights/en> (accessed on 13 March 2022).
3. Texas Natural Gas Industrial Price (Dollars per Thousand Cubic Feet) Available online: <https://www.eia.gov/dnav/ng/hist/n3035tx3m.htm> (accessed on 13 March 2023).
4. Hooey, L.; Tobiesen, A.; Johns, J.; Santos, S. Techno-Economic Study of an Integrated Steelworks Equipped with Oxygen Blast Furnace and CO<sub>2</sub> Capture. *Energy Procedia* **2013**, *37*, 7139–7151, doi:10.1016/j.egypro.2013.06.651.
5. Steel, S. The Steel Supply Chain: FAQs. *Schuff Steel* 2021.
6. Rechberger, K.; Spanlang, A.; Sasiain Conde, A.; Wolfmeir, H.; Harris, C. Green Hydrogen-Based Direct Reduction for Low-Carbon Steelmaking. *steel research international* **2020**, *91*, 2000110, doi:10.1002/srin.202000110.
7. European Parliament. Directorate General for Parliamentary Research Services. *Carbon-Free Steel Production: Cost Reduction Options and Usage of Existing Gas Infrastructure*; Publications Office: LU, 2021;
8. Obaidat, M.; Al-Ghandoor, A.; Phelan, P.; Villalobos, R.; Alkhalidi, A. Energy and Exergy Analyses of Different Aluminum Reduction Technologies. *Sustainability* **2018**, *10*, 1216, doi:10.3390/su10041216.
9. *Alumina Limited 2019 Annual Report*, 2020;
10. 2023 Gravel Prices | Crushed Stone Cost (Per Ton, Yard & Load) Available online: <https://homeguide.com/costs/gravel-prices> (accessed on 13 March 2023).
11. Caustic Soda Prices: Pricing, Chart, Latest Price, Market Analysis Available online: <https://www.procurementresource.com/resource-center/caustic-soda-price-trends> (accessed on 21 November 2022).
12. Inert Anode Technology for Aluminium Smelters | Climate Technology Centre & Network | Tue, 11/08/2016 Available online: <https://www.ctc-n.org/technologies/inert-anode-technology-aluminium-smelters> (accessed on 13 March 2023).
13. Blomberg, J. Essays on the Economics of the Aluminium Industry.; 2007.
14. *SME Mineral Processing & Extractive Metallurgy Handbook*; Kawatra, S.K., Young, C., Eds.; Society for Mining, Metallurgy & Exploration, Inc: Englewood, Colorado, 2019; ISBN 978-0-87335-385-4.
15. Zare, R. LIFE CYCLE ASSESSMENT OF SECONDARY EXTRUDED ALUMINUM PRODUCTION PROCESS IN INDUSTRIAL CITY OF ARAK. *Appl Ecol Env Res* **2016**, *14*, 125–135, doi:10.15666/aeer/1402\_125135.
16. American Recycling Available online: <http://americanrecycling.info/home/Pricing> (accessed on 1 December 2022).
17. Xianxi, W. *Inert Anodes for Aluminum Electrolysis*, The Minerals, Metals & Materials Series; Springer International Publishing: Cham, 2021; ISBN 978-3-030-28912-6.
18. Iron Oxide Price in the United States from 2013 to 2022 Available online: <https://www.statista.com/statistics/881746/average-us-iron-oxide-price/>.
19. Shah, D.U.; Schubel, P.J.; Clifford, M.J. Can Flax Replace E-Glass in Structural Composites? A Small Wind Turbine Blade Case Study. *Composites Part B: Engineering* **2013**, *52*, 172–181, doi:10.1016/j.compositesb.2013.04.027.
20. Das, S.; Warren, J.; West, D.; Laboratory, O.R.N. Global Carbon Fiber Composites Supply Chain Competitiveness Analysis. *Technical Report* **2016**.

- 116 21. Freight Rail's Role in a Net-Zero Economy – Third Way Available online: [https://www.thirdway.org/memo/freight-rails-](https://www.thirdway.org/memo/freight-rails-role-in-a-net-zero-economy)  
117 [role-in-a-net-zero-economy](https://www.thirdway.org/memo/freight-rails-role-in-a-net-zero-economy) (accessed on 13 March 2023).
- 118 22. Average U.S. Freight Rail Rates Available online: [https://www.aar.org/data/average-u-s-freight-rail-rates-since-](https://www.aar.org/data/average-u-s-freight-rail-rates-since-deregulation/)  
119 [deregulation/](https://www.aar.org/data/average-u-s-freight-rail-rates-since-deregulation/) (accessed on 13 March 2023).
- 120 23. Google Maps Available online: <https://www.google.com/maps/@45.7252364,-122.6195851,14z> (accessed on 13 March  
121 2023).
- 122 24. Cost of Capital Available online: [https://pages.stern.nyu.edu/~adamodar/New\\_Home\\_Page/datafile/wacc.html](https://pages.stern.nyu.edu/~adamodar/New_Home_Page/datafile/wacc.html)  
123 (accessed on 13 March 2023).
- 124 25. Secard, R. Nucor to Build New \$2.7 Billion Mill in West Virginia Available online:  
125 [https://www.industryweek.com/leadership/growth-strategies/article/21214007/nucor-to-build-new-27-billion-steel-](https://www.industryweek.com/leadership/growth-strategies/article/21214007/nucor-to-build-new-27-billion-steel-mill-in-west-virginia)  
126 [mill-in-west-virginia](https://www.industryweek.com/leadership/growth-strategies/article/21214007/nucor-to-build-new-27-billion-steel-mill-in-west-virginia) (accessed on 13 March 2023).
- 127 26. Producing High Quality HBI in Toledo Available online:  
128 <https://www.clevelandcliffs.com/sustainability/environment/producing-high-quality-hbi-in-toledo> (accessed on 13  
129 March 2023).
- 130 27. MIDREX Plants Available online: <https://www.midrex.com/about-midrex/midrex-plants-map/> (accessed on 13 March  
131 2023).
- 132 28. Cleveland-Cliffs Reports Lower Carbon Intensity for 2021 Available online:  
133 <https://www.fastmarkets.com/insights/cleveland-cliffs-reports-lower-carbon-intensity-for-2021> (accessed on 13  
134 March 2023).
- 135 29. DataWeb Available online: <https://dataweb.usitc.gov/> (accessed on 14 March 2023).
